# Supplementary material
Source: publisher figshare collection journal article supplement (https://geolsoc.figshare.com/ndownloader/files/5423831)
Supplement: Supplementary file 1 [file 5423831]

Appendix 1: Summary of fluid inclusion microthermometric data from the Kremnica Au-Ag epithermal deposit.
Sample	Locality	Elevation vein outcrop altitude (m.a.s.l.)	Sample altitude (m.a.s.l.)	Mineral	FI type	n inclusions	Te (min)	Te (max)	Te (mean)	Tm CO2 (min)	Tm CO2 (max)	Tm CO2 (mean)	Tm ice (min)	Tm ice (max)	Tm ice (mean)	Tm CO2hydr (min)	Tm CO2hydr (max)	Tm CO2hydr (mean)	Th CO2 (°C)	Th aq (min)	Th aq (max)	Th aq (mean)/ Thaq boiling	Salinity (min)	Salinity (max)	Salinity (mean)
KVŠ-2/799	Kirchberg	808	36	quartz	prim	13	-23.0	-23.0	-23.0				-1.3	-0.6	-1.0					214	290	266	1.1	2.2	1.7
					sec	2							-1.0	-0.6	-0.8					270	273	272	1.1	1.7	1.4
Ansa	Kirchberg	720	417	quartz	prim	12			-37.0				-1.2	-0.6	-1.0					243	268	259	1.1	2.1	1.7
					sec	3							-0.9	-0.8	-0.8					229	259	254	1.4	1.6	1.4
AS-136/176.5	Kirchberg	762	638	quartz	prim	4			-29.0				-0.8	-0.4	-0.6					260	262	260	0.7	1.4	1.0
			638	calcite	prim	15			-35.7				-0.8	-0.4	-0.6					254	349	257	0.7	1.4	1.1
					sec	3			-28.2				-0.6	-0.3	-0.5					167	255	214	0.5	1.1	0.9
LH-8a	Kirchberg	790	790	quartz	prim	19			-26.0				-1.5	-0.1	-0.3					225	283	236	0.2	2.6	0.5
					sec	4							-0.2	-0.1	-0.2					197	251	226	0.2	0.4	0.3
KB-4	Krížne	803	803	quartz	prim	19							-0.8	-0.1	-0.4					172	246	236	0.2	1.4	0.7
LH-12	Krížne	826	826	quartz	prim	21							-0.8	0.4	-0.3					223	246	234	0.0	1.4	0.5
70/85	Schindler-Teich	725	615	quartz	prim	15							-1.2	-0.4	-0.5					245	268	253	0.7	2.1	0.9
					sec	8							-0.5	0.0	-0.4					155	375	247	0.0	0.9	0.7
VolHen	Volle Henne	730	730	quartz	prim	23							-1.2	-0.4	-0.7					198	247	236	0.7	2.1	1.2
					sec	8							-0.8	-0.4	-0.7					168	272	210	0.7	1.4	1.1
VH-4	Volle Henne	730	730	quartz	prim	12							-0.4	0.0	-0.2					210	253	213	0.0	0.7	0.4
					sec	2							-0.1	0.0	-0.1					213	214	214	0.0	0.2	0.1
KAT-7/92	Katarína	763	693	quartz	prim	7							-1.4	-0.7	-0.7					242	253	251	1.2	2.4	1.2
					sec	2							-1.0	-0.7	-0.9					198	239	219	1.2	1.7	1.5
St-1	Šturec	680	680	quartz	prim	13			-38.5				-3.3	-0.3	-0.6					177	385	210	0.5	5.4	1.1
					sec	4	-34.5	-33.5	-34.0				-0.9	-0.5	-0.6					165	219	199	0.9	1.6	1.1
KŠ-2	Šturec	675	675	quartz	prim	7	-36.0	-33.5	-34.7				-1.1	-0.3	-0.6					204	260	209	0.5	5.4	1.1
					sec	6			-38.8				-0.8	-0.4	-0.5					175	210	197	0.7	1.4	0.9
			675	calcite	prim	6							-2.0	-0.5	-0.5					199	228	211	0.9	3.4	0.9
AS-4.2/97-101.5	Šturec	678	608	quartz	prim	7	-38.7	-36.1	-37.4				-1.7	-0.4	-1.0					224	256	239	0.7	2.9	1.7
					sec	2	-39.4	-37.5	-38.5				-0.4	-0.4	-0.4					234	238	236	0.7	0.7	0.7
			608	cal/dol	prim	10							-5.3	-0.3	-0.7					199	251	240	0.5	8.3	1.2
					sec	1									-0.6							231			1.1
68-85	Šturec	700	654	quartz	prim	16			-49.0				-0.6	-0.4	-0.5					175	309	212	0.7	1.1	0.9
KAT-9/317	Šturec	744	520	quartz	prim	13	-35.1	-34.4	-34.8				-0.9	-0.4	-0.6					217	255	246	0.7	1.6	1.1
					sec	3							-0.6	-0.6	-0.6					218	239	232	1.1	1.1	1.1
KR-1	2nd vein system	560	480	quartz	prim	9	-21.7	-21.7	-21.7				-2.7	-0.6	-0.8					227	245	232	1.1	4.5	1.4
					sec	8	-25.0	-25.0	-25.0				-0.6	-0.5	-0.6					206	240	234	0.9	1.1	1.1
Pyr1	2nd vein system ?	560	480	quartz	prim	17				-57.1	-56.5	-56.8	-3.6	-0.4	-1.6	1.9	12.2	8.3	31.1	189	443	260	0.7	5.9	2.7
					sec	4							-2.7	-0.7	-2.0	5.2	12.2	8.7		212	290	247	1.2	4.5	3.3
			480	dolomite	prim	5							-4.1	-4.1	-4.1					120	181	164	6.6	6.6	6.6
			480	sphalerite	prim	2							-2.1	-2.0	-2.1					247	251	249	3.4	3.5	3.5
Koper	?ertov vrch	745	745	quartz	prim	6							-1.3	-0.4	-0.5					130	209	151	0.7	2.2	0.9
					sec	2							-0.2	-0.2	-0.2					113	277	195	0.4	0.4	0.4
DV1	veins SW of ?ertov v.	580	580	quartz	prim	23							-1.0	0.0	-0.3					154	198	179	0.0	1.7	0.5
DDV-16	veins SW of ?ertov v.	580	580	quartz	prim	9							-0.2	0.0	-0.1					162	207	177	0.0	0.4	0.1
BarLeh1	veins SE of ?ertov v.	420	420	quartz	prim	10							-0.6	-0.5	-0.6					111	156	136	0.9	1.1	1.0
					sec	6							-0.3	-0.3	-0.3					130	146	133	0.5	0.5	0.5
Note: Data from samples DV1 and DDV-16 are from Uhlík and Majzlan. (2004). Temperatures are in °C units, salinities in wt% NaCl eq. Te = eutectic temperature; Tm = melting temperature; Thaq = temperature of vapor-liquid homogenization; CO2 hydr =CO2 hydrate, FI = fluid inclusion; prim = primary; sec = secondary.
